# Supplementary material for: σ-Holes promote the concertedness in nucleophilic aromatic substitution reactions of nitroarenes
Source: Royal Society of Chemistry journal article supplement (doi:10.1039/c9nj01493d), 2019-01-01
Supplement: c9nj01493d1.pdf [file c9nj01493d1.pdf]

## Electronic Supplementary Information

### $\sigma$ -Hole promotes the Concertedness in Nucleophilic Aromatic Substitution reactions of nitroarenes.

*Sebastián Gallardo-Fuentes,<sup>a</sup> Rodrigo Ormazábal-Toledo<sup>a,b\*</sup>*

<sup>a</sup>Departamento de Química, Facultad de Ciencias, Universidad de Chile, Las Palmeras 3425, Casilla  
653, Santiago de Chile.

<sup>b</sup> Centro Integrativo de Biología y Química Aplicada (CIBQA), Universidad Bernardo O Higgins,  
Santiago 8370854, Chile

#### Contents:

- |                                                   |    |
|---------------------------------------------------|----|
| 1. Expulsion of fluoride assisted by acetonitrile | S2 |
| 2. Leaving group nucleofugalities                 | S2 |
| 3. NBO Analysis                                   | S3 |
| 4. Cartesian coordinates for main TS structures.  | S4 |

## 1. Expulsion of fluoride assisted by acetonitrile

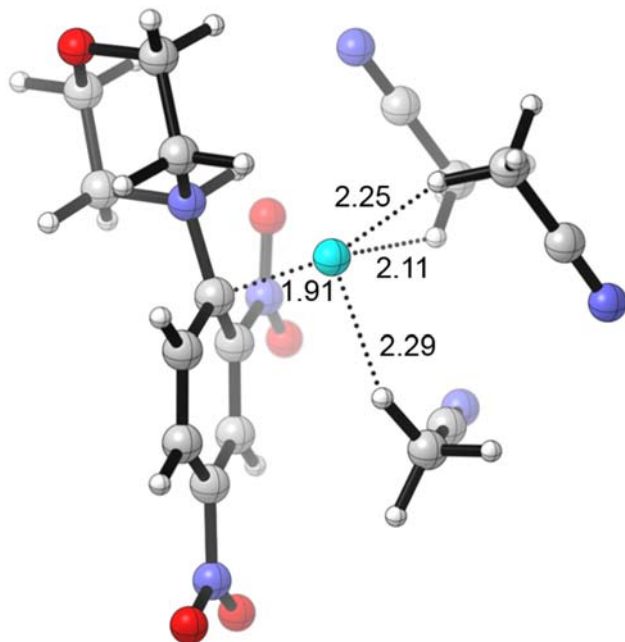

Figure S1. Expulsion of fluoride assisted by three molecules of solvent.

## 2. Leaving group nucleofugalities

Table S1. Nucleofugalities of leaving groups calculated at the M06-2x/6-31+G(d,p) level of theory.

| Substrate | Group            | Nucleofugality (eV) |
|-----------|------------------|---------------------|
| <b>1a</b> | -F               | 0.02                |
| <b>1b</b> | -Cl              | 0.02                |
| <b>1c</b> | -Br              | 0.02                |
| <b>1d</b> | -I               | 0.96                |
| <b>1e</b> | -NO <sub>2</sub> | 0.08                |
| <b>1f</b> | -OPh             | 0.51                |

### 3. NBO analysis.

Table S2. NBO population analysis for structures **1a**, **1b**, **1c** and **1d**. Charges are expressed in units of  $e$ .

|           |       | <b>1a</b> | <b>1b</b> | <b>1c</b> | <b>1d</b> |
|-----------|-------|-----------|-----------|-----------|-----------|
| Reactants | %s    | 68.58     | 81.92     | 84.46     | 88.69     |
|           | %p    | 31.40     | 18.07     | 15.54     | 11.31     |
|           | q (X) | -0.31     | 0.10      | 0.18      | 0.32      |
| TS1       | %s    | 67.49     | 81.52     | 84.93     | 88.22     |
|           | %p    | 32.50     | 18.47     | 15.07     | 11.78     |
|           | q (X) | -0.33     | 0.10      | -0.02     | 0.32      |
| MC        | %s    | 71.63     | 86.48     | 88.83     | 91.60     |
|           | %p    | 28.37     | 13.52     | 11.17     | 8.40      |
|           | q (X) | -0.39     | -0.14     | -0.08     | 0.02      |
| TS2       | %s    | 81.73     | 88.12     | 89.35     | 92.11     |
|           | %p    | 18.27     | 11.88     | 10.65     | 7.89      |
|           | q (X) | -0.70     | -0.28     | -0.27     | -0.25     |
| Products  | %s    | 61.82     | 87.42     | 88.62     | 93.80     |
|           | %p    | 38.16     | 12.58     | 11.38     | 6.20      |
|           | q (X) | -0.65     | -0.85     | -0.83     | -0.87     |

By using the same argument by Politzer, the  $s$  unshared electrons have a little  $p$  character in the **1b-d** cases. For **1a**, the  $p$  character is almost double than other substrates. In the same line, natural charge over the leaving group is negative for fluorine and positive for Cl, Br and I. Passing through **TS1**, the  $s$  and  $p$  character of the unshared electrons remains similar, with a negative change of natural charge of bromine. At the **MC-Z** stage, the charge over iodine is still positive, with a similar  $s$  character. For fluorine, the  $s$  unshared pair have a less important  $p$  character, which at **TS2** displays similar values than **1b-d**. At the products stage, the situation turns back due to the stabilization of fluoride by hydrogen bonds.

#### 4. Cartesian coordinates for main TS structures.

TS1-1a in acetonitrile

|    |   |   |           |           |           |
|----|---|---|-----------|-----------|-----------|
| 1  | 6 | 0 | 0.005675  | -0.036623 | 0.033010  |
| 2  | 6 | 0 | 0.048597  | -0.046537 | 1.448505  |
| 3  | 6 | 0 | 1.250772  | -0.024760 | 2.110432  |
| 4  | 6 | 0 | 2.445680  | 0.088047  | 1.376334  |
| 5  | 6 | 0 | 2.440916  | 0.199554  | -0.001666 |
| 6  | 6 | 0 | 1.222674  | 0.172688  | -0.665400 |
| 7  | 1 | 0 | -0.892152 | -0.083412 | 1.986687  |
| 8  | 1 | 0 | 1.281196  | -0.059843 | 3.193456  |
| 9  | 1 | 0 | 3.361250  | 0.305303  | -0.564031 |
| 10 | 7 | 0 | 3.712571  | 0.113188  | 2.076191  |
| 11 | 8 | 0 | 3.698890  | 0.010580  | 3.296354  |
| 12 | 8 | 0 | 4.739539  | 0.233581  | 1.420189  |
| 13 | 7 | 0 | 1.234604  | 0.221722  | -2.109739 |
| 14 | 8 | 0 | 2.243610  | 0.629793  | -2.668951 |
| 15 | 8 | 0 | 0.238306  | -0.167952 | -2.705785 |
| 16 | 9 | 0 | -1.155270 | 0.357959  | -0.518568 |
| 17 | 1 | 0 | 1.316127  | -4.971595 | -0.437325 |
| 18 | 6 | 0 | 0.418350  | -4.370794 | -0.602287 |
| 19 | 8 | 0 | -0.551407 | -4.806283 | 0.339020  |
| 20 | 6 | 0 | 0.724324  | -2.888852 | -0.421080 |
| 21 | 1 | 0 | 0.049968  | -4.553503 | -1.623993 |
| 22 | 6 | 0 | -1.763082 | -4.078406 | 0.201024  |
| 23 | 7 | 0 | -0.491871 | -2.077938 | -0.482848 |
| 24 | 1 | 0 | 1.424523  | -2.554427 | -1.193440 |
| 25 | 1 | 0 | 1.181491  | -2.720529 | 0.563821  |
| 26 | 6 | 0 | -1.524477 | -2.589003 | 0.419955  |
| 27 | 1 | 0 | -2.185021 | -4.247796 | -0.802101 |
| 28 | 1 | 0 | -2.458570 | -4.470536 | 0.947123  |
| 29 | 1 | 0 | -0.845635 | -2.022898 | -1.438600 |
| 30 | 1 | 0 | -2.448614 | -2.024776 | 0.264242  |
| 31 | 1 | 0 | -1.179487 | -2.427682 | 1.449241  |

SCF Done: E(RM062X) = -1027.92442563 A.U. after 1 cycles  
 Frequencies -- -197.2435 cm<sup>-1</sup>

TS2-1a in acetonitrile

|    |   |   |           |           |           |
|----|---|---|-----------|-----------|-----------|
| 1  | 6 | 0 | 0.002312  | -0.002459 | -0.001592 |
| 2  | 6 | 0 | 0.002045  | -0.018014 | 1.412722  |
| 3  | 6 | 0 | 1.175902  | -0.011465 | 2.129661  |
| 4  | 6 | 0 | 2.398067  | -0.063613 | 1.450329  |
| 5  | 6 | 0 | 2.453059  | -0.140330 | 0.073508  |
| 6  | 6 | 0 | 1.264258  | -0.155853 | -0.643536 |
| 7  | 1 | 0 | -0.936663 | 0.017110  | 1.948664  |
| 8  | 1 | 0 | 1.152240  | 0.017724  | 3.212944  |
| 9  | 1 | 0 | 3.400931  | -0.189544 | -0.447780 |
| 10 | 7 | 0 | 3.641048  | -0.060130 | 2.203384  |
| 11 | 8 | 0 | 3.572339  | 0.006515  | 3.422290  |
| 12 | 8 | 0 | 4.693806  | -0.123405 | 1.584658  |
| 13 | 7 | 0 | 1.386259  | -0.178216 | -2.089503 |
| 14 | 8 | 0 | 2.499950  | -0.246795 | -2.580556 |
| 15 | 8 | 0 | 0.362407  | -0.129505 | -2.768912 |
| 16 | 9 | 0 | -0.425428 | 1.815688  | -0.517885 |
| 17 | 1 | 0 | -2.566830 | -3.305944 | -1.924591 |

|    |   |   |           |           |           |
|----|---|---|-----------|-----------|-----------|
| 18 | 6 | 0 | -2.501611 | -2.225334 | -1.786454 |
| 19 | 8 | 0 | -3.695987 | -1.799001 | -1.159193 |
| 20 | 6 | 0 | -1.280090 | -1.912596 | -0.936484 |
| 21 | 1 | 0 | -2.400816 | -1.747472 | -2.773221 |
| 22 | 6 | 0 | -3.672221 | -0.400025 | -0.932942 |
| 23 | 7 | 0 | -1.241616 | -0.425088 | -0.685331 |
| 24 | 1 | 0 | -0.366599 | -2.207111 | -1.454697 |
| 25 | 1 | 0 | -1.327174 | -2.394413 | 0.042780  |
| 26 | 6 | 0 | -2.526337 | -0.018393 | -0.012260 |
| 27 | 1 | 0 | -3.589716 | 0.136955  | -1.889942 |
| 28 | 1 | 0 | -4.614503 | -0.127877 | -0.454647 |
| 29 | 1 | 0 | -1.214140 | 0.059283  | -1.593724 |
| 30 | 1 | 0 | -2.477133 | 1.055407  | 0.160401  |
| 31 | 1 | 0 | -2.604591 | -0.569291 | 0.925333  |

SCF Done: E(RM062X) = -1027.92427441 A.U. after 1 cycles  
Frequencies -- -338.9986 cm<sup>-1</sup>

TS1-cat-la in acetonitrile

|    |   |   |           |           |           |
|----|---|---|-----------|-----------|-----------|
| 1  | 6 | 0 | 0.405455  | 0.354819  | 0.537541  |
| 2  | 6 | 0 | 0.422936  | -0.000950 | 1.903265  |
| 3  | 6 | 0 | 1.582278  | -0.446316 | 2.490405  |
| 4  | 6 | 0 | 2.770142  | -0.472307 | 1.738879  |
| 5  | 6 | 0 | 2.809747  | -0.048892 | 0.423779  |
| 6  | 6 | 0 | 1.632522  | 0.393149  | -0.165277 |
| 7  | 1 | 0 | -0.503512 | 0.071977  | 2.462320  |
| 8  | 1 | 0 | 1.591886  | -0.746005 | 3.532038  |
| 9  | 1 | 0 | 3.730809  | -0.058347 | -0.146753 |
| 10 | 7 | 0 | 3.995421  | -0.936139 | 2.360596  |
| 11 | 8 | 0 | 3.941055  | -1.321738 | 3.520921  |
| 12 | 8 | 0 | 5.025179  | -0.922686 | 1.699476  |
| 13 | 7 | 0 | 1.672398  | 0.769851  | -1.561239 |
| 14 | 8 | 0 | 2.763765  | 0.978235  | -2.073529 |
| 15 | 8 | 0 | 0.612599  | 0.840454  | -2.170124 |
| 16 | 9 | 0 | -0.630665 | 1.101621  | 0.130225  |
| 17 | 1 | 0 | 0.497796  | -4.431844 | -1.576999 |
| 18 | 6 | 0 | -0.253085 | -3.666100 | -1.366207 |
| 19 | 8 | 0 | -1.138498 | -4.210435 | -0.397741 |
| 20 | 6 | 0 | 0.399686  | -2.391080 | -0.843956 |
| 21 | 1 | 0 | -0.808875 | -3.447619 | -2.292435 |
| 22 | 6 | 0 | -2.161936 | -3.285104 | -0.058668 |
| 23 | 7 | 0 | -0.598621 | -1.414481 | -0.421629 |
| 24 | 1 | 0 | 1.035095  | -1.954147 | -1.622627 |
| 25 | 1 | 0 | 1.031037  | -2.632649 | 0.023248  |
| 26 | 6 | 0 | -1.562738 | -2.000453 | 0.504338  |
| 27 | 1 | 0 | -2.762651 | -3.055503 | -0.953968 |
| 28 | 1 | 0 | -2.801595 | -3.775288 | 0.680099  |
| 29 | 1 | 0 | -1.103003 | -1.003210 | -1.220902 |
| 30 | 1 | 0 | -2.354393 | -1.269840 | 0.704448  |
| 31 | 1 | 0 | -1.048058 | -2.225099 | 1.448947  |
| 32 | 1 | 0 | -2.324942 | 0.031410  | -5.898294 |
| 33 | 6 | 0 | -2.486925 | 0.456927  | -4.903982 |
| 34 | 8 | 0 | -3.891122 | 0.632725  | -4.757256 |
| 35 | 6 | 0 | -1.938464 | -0.456367 | -3.815706 |
| 36 | 1 | 0 | -1.987397 | 1.438725  | -4.852553 |
| 37 | 6 | 0 | -4.211174 | 1.187203  | -3.486910 |
| 38 | 7 | 0 | -2.269082 | 0.027018  | -2.471544 |
| 39 | 1 | 0 | -0.850664 | -0.545333 | -3.907729 |

|    |   |   |           |           |           |
|----|---|---|-----------|-----------|-----------|
| 40 | 1 | 0 | -2.375508 | -1.456963 | -3.931605 |
| 41 | 6 | 0 | -3.706607 | 0.293590  | -2.361311 |
| 42 | 1 | 0 | -3.757906 | 2.188583  | -3.400145 |
| 43 | 1 | 0 | -5.299414 | 1.291041  | -3.453650 |
| 44 | 1 | 0 | -1.752956 | 0.889041  | -2.292251 |
| 45 | 1 | 0 | -3.913814 | 0.757082  | -1.391357 |
| 46 | 1 | 0 | -4.234486 | -0.668102 | -2.401294 |

SCF Done: E(RM062X) = -1315.62722927 A.U. after 2 cycles  
Frequencies -- -338.9986 cm<sup>-1</sup>

TS2-cat-1a in acetonitrile

|    |   |   |           |           |           |
|----|---|---|-----------|-----------|-----------|
| 1  | 6 | 0 | 0.002359  | -0.057867 | -0.004340 |
| 2  | 6 | 0 | 0.014504  | -0.050621 | 1.489735  |
| 3  | 6 | 0 | 1.133789  | 0.015235  | 2.237956  |
| 4  | 6 | 0 | 2.421150  | 0.105689  | 1.618503  |
| 5  | 6 | 0 | 2.514590  | 0.222295  | 0.248011  |
| 6  | 6 | 0 | 1.377031  | 0.166118  | -0.543756 |
| 7  | 1 | 0 | -0.955557 | -0.052705 | 1.972570  |
| 8  | 1 | 0 | 1.062809  | 0.028474  | 3.319878  |
| 9  | 1 | 0 | 3.477901  | 0.360885  | -0.228083 |
| 10 | 7 | 0 | 3.595547  | 0.144239  | 2.411158  |
| 11 | 8 | 0 | 3.477911  | 0.071867  | 3.637929  |
| 12 | 8 | 0 | 4.694920  | 0.247459  | 1.859482  |
| 13 | 7 | 0 | 1.551230  | 0.333548  | -1.935941 |
| 14 | 8 | 0 | 2.655761  | 0.641584  | -2.388313 |
| 15 | 8 | 0 | 0.573239  | 0.149578  | -2.674418 |
| 16 | 9 | 0 | -0.860970 | 0.998707  | -0.412912 |
| 17 | 1 | 0 | 0.101900  | -4.423389 | -1.574386 |
| 18 | 6 | 0 | -0.577923 | -3.578663 | -1.447465 |
| 19 | 8 | 0 | -1.623560 | -3.997130 | -0.589457 |
| 20 | 6 | 0 | 0.194061  | -2.406136 | -0.863769 |
| 21 | 1 | 0 | -0.989414 | -3.304716 | -2.430650 |
| 22 | 6 | 0 | -2.534830 | -2.930769 | -0.394617 |
| 23 | 7 | 0 | -0.724997 | -1.265293 | -0.593226 |
| 24 | 1 | 0 | 0.954747  | -2.093329 | -1.579571 |
| 25 | 1 | 0 | 0.675376  | -2.689981 | 0.079954  |
| 26 | 6 | 0 | -1.847141 | -1.747413 | 0.269219  |
| 27 | 1 | 0 | -2.978085 | -2.646403 | -1.360375 |
| 28 | 1 | 0 | -3.329386 | -3.291630 | 0.261644  |
| 29 | 1 | 0 | -2.553307 | -0.924848 | 0.414440  |
| 30 | 1 | 0 | -1.447468 | -2.067207 | 1.235273  |
| 31 | 1 | 0 | -1.304180 | -0.870549 | -1.577093 |
| 32 | 1 | 0 | -1.579237 | 0.562314  | -2.768406 |
| 33 | 7 | 0 | -2.117075 | -0.291444 | -2.599768 |
| 34 | 6 | 0 | -3.489461 | 0.097402  | -2.215332 |
| 35 | 1 | 0 | -4.036445 | -0.809210 | -1.934901 |
| 36 | 1 | 0 | -3.437767 | 0.761464  | -1.347869 |
| 37 | 6 | 0 | -2.128982 | -1.084407 | -3.844213 |
| 38 | 1 | 0 | -1.095315 | -1.277566 | -4.146270 |
| 39 | 1 | 0 | -2.618337 | -2.040922 | -3.627438 |
| 40 | 6 | 0 | -4.198926 | 0.784377  | -3.372667 |
| 41 | 1 | 0 | -5.241488 | 0.990087  | -3.118727 |
| 42 | 1 | 0 | -3.696696 | 1.736645  | -3.606761 |
| 43 | 6 | 0 | -2.885800 | -0.356810 | -4.943929 |
| 44 | 1 | 0 | -2.354736 | 0.570555  | -5.212675 |
| 45 | 1 | 0 | -2.971160 | -0.983346 | -5.834995 |
| 46 | 8 | 0 | -4.207971 | -0.044835 | -4.526786 |

SCF Done: E(RM062X) = -1315.65035761 A.U. after 1 cycles  
Frequencies -- -338.9986 cm<sup>-1</sup>

TS3-cat-1a in acetonitrile

|    |   |   |           |           |           |
|----|---|---|-----------|-----------|-----------|
| 1  | 6 | 0 | 0.020223  | 0.051957  | 0.023271  |
| 2  | 6 | 0 | -0.015913 | -0.012005 | 1.485477  |
| 3  | 6 | 0 | 1.098875  | -0.073459 | 2.256307  |
| 4  | 6 | 0 | 2.383526  | -0.103713 | 1.648931  |
| 5  | 6 | 0 | 2.507553  | -0.064933 | 0.276357  |
| 6  | 6 | 0 | 1.372204  | -0.014832 | -0.523999 |
| 7  | 1 | 0 | -0.985457 | 0.004860  | 1.966086  |
| 8  | 1 | 0 | 1.015788  | -0.121244 | 3.336300  |
| 9  | 1 | 0 | 3.485666  | -0.063084 | -0.188261 |
| 10 | 7 | 0 | 3.556639  | -0.182229 | 2.459868  |
| 11 | 8 | 0 | 3.419802  | -0.184862 | 3.683377  |
| 12 | 8 | 0 | 4.658840  | -0.246039 | 1.915546  |
| 13 | 7 | 0 | 1.603155  | 0.154987  | -1.926518 |
| 14 | 8 | 0 | 2.747894  | 0.035723  | -2.363443 |
| 15 | 8 | 0 | 0.655075  | 0.433103  | -2.662820 |
| 16 | 9 | 0 | -0.380721 | 1.769780  | -0.191789 |
| 17 | 1 | 0 | -1.748119 | -3.152962 | -2.709988 |
| 18 | 6 | 0 | -1.912240 | -2.165994 | -2.271498 |
| 19 | 8 | 0 | -3.155115 | -2.214145 | -1.590344 |
| 20 | 6 | 0 | -0.776893 | -1.818819 | -1.326014 |
| 21 | 1 | 0 | -1.960255 | -1.417092 | -3.079176 |
| 22 | 6 | 0 | -3.436501 | -0.957604 | -0.996718 |
| 23 | 7 | 0 | -1.049106 | -0.516781 | -0.698535 |
| 24 | 1 | 0 | 0.150636  | -1.791741 | -1.897052 |
| 25 | 1 | 0 | -0.688124 | -2.599940 | -0.553070 |
| 26 | 6 | 0 | -2.346120 | -0.550359 | -0.016739 |
| 27 | 1 | 0 | -3.556532 | -0.202299 | -1.788137 |
| 28 | 1 | 0 | -4.386903 | -1.058932 | -0.467266 |
| 29 | 1 | 0 | -2.568404 | 0.442690  | 0.384588  |
| 30 | 1 | 0 | -2.340168 | -1.275184 | 0.813827  |
| 31 | 1 | 0 | -1.814763 | 0.994697  | -2.758615 |
| 32 | 1 | 0 | -0.982123 | 1.942145  | -1.718957 |
| 33 | 7 | 0 | -1.656784 | 1.980853  | -2.520435 |
| 34 | 6 | 0 | -2.918316 | 2.616182  | -2.039127 |
| 35 | 1 | 0 | -3.667558 | 2.507853  | -2.826938 |
| 36 | 1 | 0 | -3.243461 | 2.088492  | -1.140453 |
| 37 | 6 | 0 | -1.096690 | 2.717652  | -3.691300 |
| 38 | 1 | 0 | -0.146965 | 2.256547  | -3.962827 |
| 39 | 1 | 0 | -1.812216 | 2.615083  | -4.510691 |
| 40 | 6 | 0 | -2.640393 | 4.079696  | -1.740807 |
| 41 | 1 | 0 | -3.567900 | 4.576672  | -1.451191 |
| 42 | 1 | 0 | -1.919318 | 4.164118  | -0.913738 |
| 43 | 6 | 0 | -0.913188 | 4.175199  | -3.310223 |
| 44 | 1 | 0 | -0.162258 | 4.263476  | -2.510227 |
| 45 | 1 | 0 | -0.571349 | 4.739471  | -4.179552 |
| 46 | 8 | 0 | -2.139242 | 4.749617  | -2.886482 |

SCF Done: E(RM062X) = -1315.64944542 A.U. after 1 cycles  
Frequencies -- -338.9986 cm<sup>-1</sup>

TS1-1a+3 acetonitrile molecules

|   |   |   |           |           |           |
|---|---|---|-----------|-----------|-----------|
| 1 | 6 | 0 | -1.167491 | -0.072444 | -0.659138 |
| 2 | 6 | 0 | -1.189673 | 0.336852  | 0.698328  |
| 3 | 6 | 0 | -0.019344 | 0.505942  | 1.394560  |

|    |   |   |           |           |           |
|----|---|---|-----------|-----------|-----------|
| 4  | 6 | 0 | 1.211536  | 0.351692  | 0.730690  |
| 5  | 6 | 0 | 1.276165  | 0.071112  | -0.622095 |
| 6  | 6 | 0 | 0.088927  | -0.107419 | -1.319886 |
| 7  | 1 | 0 | -2.155824 | 0.488930  | 1.167776  |
| 8  | 1 | 0 | -0.037937 | 0.786456  | 2.441635  |
| 9  | 1 | 0 | 2.227513  | -0.016686 | -1.135647 |
| 10 | 7 | 0 | 2.442222  | 0.520125  | 1.469668  |
| 11 | 8 | 0 | 2.369220  | 0.843295  | 2.649526  |
| 12 | 8 | 0 | 3.504491  | 0.334853  | 0.887856  |
| 13 | 7 | 0 | 0.164567  | -0.488882 | -2.711089 |
| 14 | 8 | 0 | 1.213337  | -0.291139 | -3.311114 |
| 15 | 8 | 0 | -0.819397 | -1.009798 | -3.218458 |
| 16 | 9 | 0 | -2.285747 | 0.174828  | -1.363987 |
| 17 | 1 | 0 | -0.049312 | -4.975265 | 0.333221  |
| 18 | 6 | 0 | -0.914241 | -4.411946 | -0.025301 |
| 19 | 8 | 0 | -1.929916 | -4.536331 | 0.959053  |
| 20 | 6 | 0 | -0.546738 | -2.949389 | -0.244163 |
| 21 | 1 | 0 | -1.260184 | -4.855385 | -0.972213 |
| 22 | 6 | 0 | -3.102769 | -3.833431 | 0.575816  |
| 23 | 7 | 0 | -1.723183 | -2.147033 | -0.580785 |
| 24 | 1 | 0 | 0.194197  | -2.867195 | -1.045773 |
| 25 | 1 | 0 | -0.116972 | -2.530950 | 0.676127  |
| 26 | 6 | 0 | -2.803021 | -2.350429 | 0.386900  |
| 27 | 1 | 0 | -3.501621 | -4.258573 | -0.358469 |
| 28 | 1 | 0 | -3.837278 | -3.978149 | 1.371720  |
| 29 | 1 | 0 | -2.045533 | -2.350823 | -1.527837 |
| 30 | 1 | 0 | -3.695170 | -1.816649 | 0.047049  |
| 31 | 1 | 0 | -2.478493 | -1.924958 | 1.345119  |
| 32 | 6 | 0 | 1.571175  | 2.799806  | -3.410754 |
| 33 | 1 | 0 | 2.048966  | 2.460033  | -4.332090 |
| 34 | 1 | 0 | 1.745037  | 3.869615  | -3.274558 |
| 35 | 1 | 0 | 1.989707  | 2.259086  | -2.558975 |
| 36 | 6 | 0 | -1.859451 | 3.574692  | -0.507614 |
| 37 | 1 | 0 | -2.131150 | 4.457217  | -1.091034 |
| 38 | 1 | 0 | -2.273582 | 3.660536  | 0.499500  |
| 39 | 1 | 0 | -2.259019 | 2.682785  | -0.994603 |
| 40 | 6 | 0 | 3.868866  | 3.418349  | 0.990241  |
| 41 | 1 | 0 | 4.479307  | 2.809398  | 1.660147  |
| 42 | 1 | 0 | 2.809214  | 3.282739  | 1.219826  |
| 43 | 1 | 0 | 4.128181  | 4.472245  | 1.113582  |
| 44 | 6 | 0 | 0.137896  | 2.540865  | -3.477815 |
| 45 | 7 | 0 | -0.998333 | 2.320894  | -3.511854 |
| 46 | 6 | 0 | -0.406336 | 3.475205  | -0.427217 |
| 47 | 7 | 0 | 0.747115  | 3.399166  | -0.362833 |
| 48 | 6 | 0 | 4.113852  | 3.019094  | -0.390958 |
| 49 | 7 | 0 | 4.310704  | 2.708444  | -1.488404 |

SCF Done: E(RM062X) = -1426.07697396 A.U. after 1 cycles  
Frequencies -- -192.0672 cm<sup>-1</sup>

TS2-1a+3 acetonitrile molecules

|   |   |   |           |           |          |
|---|---|---|-----------|-----------|----------|
| 1 | 6 | 0 | -0.017214 | -0.070756 | 0.221048 |
| 2 | 6 | 0 | -0.484124 | -0.247588 | 1.547780 |
| 3 | 6 | 0 | 0.383804  | -0.322726 | 2.610854 |
| 4 | 6 | 0 | 1.764197  | -0.294754 | 2.377249 |
| 5 | 6 | 0 | 2.274507  | -0.215350 | 1.098072 |
| 6 | 6 | 0 | 1.392819  | -0.155354 | 0.026928 |
| 7 | 1 | 0 | -1.547814 | -0.273117 | 1.741196 |



|    |   |   |           |           |           |
|----|---|---|-----------|-----------|-----------|
| 8  | 1 | 0 | 0.001595  | -0.412485 | 3.621289  |
| 9  | 1 | 0 | 3.342328  | -0.195900 | 0.918131  |
| 10 | 7 | 0 | 2.684971  | -0.334951 | 3.499114  |
| 11 | 8 | 0 | 2.213040  | -0.401268 | 4.625620  |
| 12 | 8 | 0 | 3.885158  | -0.293886 | 3.267555  |
| 13 | 7 | 0 | 1.992281  | -0.023904 | -1.286145 |
| 14 | 8 | 0 | 3.206613  | -0.023603 | -1.380517 |
| 15 | 8 | 0 | 1.248510  | 0.079569  | -2.261987 |
| 16 | 9 | 0 | -0.320699 | 1.770225  | -0.198189 |
| 17 | 1 | 0 | -1.658583 | -3.160700 | -2.774402 |
| 18 | 6 | 0 | -1.704803 | -2.104176 | -2.505076 |
| 19 | 8 | 0 | -3.058371 | -1.784745 | -2.244719 |
| 20 | 6 | 0 | -0.832207 | -1.870938 | -1.282632 |
| 21 | 1 | 0 | -1.330669 | -1.505099 | -3.350137 |
| 22 | 6 | 0 | -3.185964 | -0.419977 | -1.881308 |
| 23 | 7 | 0 | -0.951976 | -0.422646 | -0.876968 |
| 24 | 1 | 0 | 0.211626  | -2.089578 | -1.509103 |
| 25 | 1 | 0 | -1.161410 | -2.463411 | -0.425908 |
| 26 | 6 | 0 | -2.403799 | -0.118479 | -0.614411 |
| 27 | 1 | 0 | -2.845554 | 0.225323  | -2.703422 |
| 28 | 1 | 0 | -4.243467 | -0.227638 | -1.692293 |
| 29 | 1 | 0 | -0.662373 | 0.169647  | -1.670850 |
| 30 | 1 | 0 | -2.471818 | 0.931392  | -0.331621 |
| 31 | 1 | 0 | -2.741352 | -0.768913 | 0.193145  |
| 32 | 6 | 0 | 1.070045  | 3.048412  | -2.662085 |
| 33 | 1 | 0 | 1.969397  | 2.622789  | -3.113276 |
| 34 | 1 | 0 | 1.028926  | 4.120174  | -2.871837 |
| 35 | 1 | 0 | 1.076080  | 2.871635  | -1.581889 |
| 36 | 6 | 0 | -1.370319 | 4.642837  | -0.922219 |
| 37 | 1 | 0 | -1.269976 | 3.559621  | -0.786748 |
| 38 | 1 | 0 | -1.485482 | 4.881058  | -1.982457 |
| 39 | 1 | 0 | -2.240941 | 5.007830  | -0.372713 |
| 40 | 6 | 0 | 1.572658  | 3.086023  | 2.015718  |
| 41 | 1 | 0 | 2.005642  | 2.608352  | 2.898353  |
| 42 | 1 | 0 | 0.657222  | 2.568040  | 1.711945  |
| 43 | 1 | 0 | 1.350850  | 4.131511  | 2.240102  |
| 44 | 6 | 0 | -0.109807 | 2.391232  | -3.210352 |
| 45 | 7 | 0 | -1.050325 | 1.859690  | -3.627869 |
| 46 | 6 | 0 | -0.165660 | 5.283262  | -0.407291 |
| 47 | 7 | 0 | 0.799806  | 5.774890  | 0.000342  |
| 48 | 6 | 0 | 2.518059  | 3.017876  | 0.907418  |
| 49 | 7 | 0 | 3.259314  | 2.949727  | 0.020496  |

SCF Done: E(RM062X) = -1426.07738168 A.U. after 1 cycles  
Frequencies -- -326.7415 cm<sup>-1</sup>

TS1-1b in acetonitrile

|    |   |   |           |           |           |
|----|---|---|-----------|-----------|-----------|
| 1  | 6 | 0 | 0.012109  | -0.039381 | 0.024106  |
| 2  | 6 | 0 | 0.031624  | -0.025804 | 1.451889  |
| 3  | 6 | 0 | 1.210489  | 0.007870  | 2.151306  |
| 4  | 6 | 0 | 2.430413  | 0.119898  | 1.458999  |
| 5  | 6 | 0 | 2.462220  | 0.215368  | 0.080617  |
| 6  | 6 | 0 | 1.266708  | 0.164768  | -0.621158 |
| 7  | 1 | 0 | -0.914994 | -0.046959 | 1.980123  |
| 8  | 1 | 0 | 1.201017  | -0.009875 | 3.235323  |
| 9  | 1 | 0 | 3.397586  | 0.323813  | -0.455935 |
| 10 | 7 | 0 | 3.671123  | 0.172837  | 2.195109  |

|    |    |   |           |           |           |
|----|----|---|-----------|-----------|-----------|
| 11 | 8  | 0 | 3.620662  | 0.104442  | 3.417663  |
| 12 | 8  | 0 | 4.718967  | 0.282456  | 1.568831  |
| 13 | 7  | 0 | 1.357110  | 0.189987  | -2.065443 |
| 14 | 8  | 0 | 2.337623  | 0.711309  | -2.579612 |
| 15 | 8  | 0 | 0.457343  | -0.340362 | -2.705679 |
| 16 | 1  | 0 | 1.365298  | -4.912291 | -0.291424 |
| 17 | 6  | 0 | 0.469039  | -4.324257 | -0.502371 |
| 18 | 8  | 0 | -0.535444 | -4.756289 | 0.401526  |
| 19 | 6  | 0 | 0.757548  | -2.837231 | -0.326520 |
| 20 | 1  | 0 | 0.148355  | -4.521675 | -1.537015 |
| 21 | 6  | 0 | -1.744420 | -4.040477 | 0.202727  |
| 22 | 7  | 0 | -0.464425 | -2.042125 | -0.456047 |
| 23 | 1  | 0 | 1.486723  | -2.509290 | -1.073397 |
| 24 | 1  | 0 | 1.165656  | -2.650877 | 0.675996  |
| 25 | 6  | 0 | -1.527104 | -2.546181 | 0.415165  |
| 26 | 1  | 0 | -2.122565 | -4.224258 | -0.814894 |
| 27 | 1  | 0 | -2.468146 | -4.425944 | 0.924603  |
| 28 | 1  | 0 | -0.774067 | -2.005240 | -1.428766 |
| 29 | 1  | 0 | -2.449749 | -1.993741 | 0.216209  |
| 30 | 1  | 0 | -1.219494 | -2.369352 | 1.453171  |
| 31 | 17 | 0 | -1.463111 | 0.616076  | -0.694407 |

SCF Done: E(RM062X) = -1388.27536431 A.U. after 1 cycles

Frequencies -- -225.0263 cm<sup>-1</sup>

TS1-1c in acetonitrile

|    |    |   |           |           |           |
|----|----|---|-----------|-----------|-----------|
| 1  | 6  | 0 | 0.010769  | -0.031206 | 0.010720  |
| 2  | 6  | 0 | 0.015031  | -0.008941 | 1.435632  |
| 3  | 6  | 0 | 1.187524  | 0.025020  | 2.147557  |
| 4  | 6  | 0 | 2.411972  | 0.131212  | 1.464144  |
| 5  | 6  | 0 | 2.458912  | 0.202245  | 0.084722  |
| 6  | 6  | 0 | 1.268670  | 0.149884  | -0.627001 |
| 7  | 1  | 0 | -0.934077 | -0.023344 | 1.959413  |
| 8  | 1  | 0 | 1.167936  | 0.015504  | 3.231544  |
| 9  | 1  | 0 | 3.400448  | 0.295504  | -0.443887 |
| 10 | 7  | 0 | 3.647387  | 0.185494  | 2.211629  |
| 11 | 8  | 0 | 3.585441  | 0.124031  | 3.433653  |
| 12 | 8  | 0 | 4.700539  | 0.290138  | 1.594115  |
| 13 | 7  | 0 | 1.372223  | 0.146666  | -2.072154 |
| 14 | 8  | 0 | 2.373889  | 0.626402  | -2.586126 |
| 15 | 8  | 0 | 0.460133  | -0.364305 | -2.710194 |
| 16 | 1  | 0 | 1.270386  | -4.936876 | -0.240878 |
| 17 | 6  | 0 | 0.388023  | -4.337109 | -0.475745 |
| 18 | 8  | 0 | -0.639512 | -4.739896 | 0.415726  |
| 19 | 6  | 0 | 0.697213  | -2.852514 | -0.313405 |
| 20 | 1  | 0 | 0.082744  | -4.542670 | -1.513416 |
| 21 | 6  | 0 | -1.832977 | -4.007855 | 0.185386  |
| 22 | 7  | 0 | -0.508159 | -2.039100 | -0.474993 |
| 23 | 1  | 0 | 1.446143  | -2.545063 | -1.049669 |
| 24 | 1  | 0 | 1.088621  | -2.661178 | 0.694990  |
| 25 | 6  | 0 | -1.595103 | -2.514639 | 0.380708  |
| 26 | 1  | 0 | -2.195768 | -4.199893 | -0.836303 |
| 27 | 1  | 0 | -2.575396 | -4.371450 | 0.899597  |
| 28 | 1  | 0 | -0.796906 | -2.005461 | -1.454066 |
| 29 | 1  | 0 | -2.506255 | -1.952590 | 0.157415  |
| 30 | 1  | 0 | -1.305655 | -2.328570 | 1.422594  |
| 31 | 35 | 0 | -1.582129 | 0.710675  | -0.774958 |

SCF Done: E(RM062X) = -3499.91939854 A.U. after 1 cycles

Frequencies -- -213.5855 cm<sup>-1</sup>

TS1-1d in acetonitrile

|    |    |   |           |           |           |
|----|----|---|-----------|-----------|-----------|
| 1  | 6  | 0 | 0.012180  | -0.010434 | 0.014331  |
| 2  | 6  | 0 | 0.014566  | -0.013559 | 1.440236  |
| 3  | 6  | 0 | 1.184020  | 0.000659  | 2.159408  |
| 4  | 6  | 0 | 2.414617  | 0.103088  | 1.489954  |
| 5  | 6  | 0 | 2.466811  | 0.195261  | 0.112763  |
| 6  | 6  | 0 | 1.280205  | 0.155114  | -0.604287 |
| 7  | 1  | 0 | -0.934701 | -0.029547 | 1.963032  |
| 8  | 1  | 0 | 1.160181  | -0.025554 | 3.242827  |
| 9  | 1  | 0 | 3.410950  | 0.291213  | -0.409701 |
| 10 | 7  | 0 | 3.644085  | 0.144869  | 2.246234  |
| 11 | 8  | 0 | 3.569846  | 0.085614  | 3.465593  |
| 12 | 8  | 0 | 4.698955  | 0.236844  | 1.633682  |
| 13 | 7  | 0 | 1.400920  | 0.167453  | -2.047673 |
| 14 | 8  | 0 | 2.384457  | 0.692430  | -2.546167 |
| 15 | 8  | 0 | 0.518349  | -0.379789 | -2.695460 |
| 16 | 1  | 0 | 1.280861  | -4.901715 | -0.420792 |
| 17 | 6  | 0 | 0.384781  | -4.300534 | -0.595036 |
| 18 | 8  | 0 | -0.592617 | -4.732452 | 0.331845  |
| 19 | 6  | 0 | 0.696076  | -2.817877 | -0.410457 |
| 20 | 1  | 0 | 0.034005  | -4.477623 | -1.624000 |
| 21 | 6  | 0 | -1.796468 | -4.005030 | 0.175825  |
| 22 | 7  | 0 | -0.519310 | -2.009246 | -0.492919 |
| 23 | 1  | 0 | 1.405700  | -2.484017 | -1.172826 |
| 24 | 1  | 0 | 1.132312  | -2.648847 | 0.583059  |
| 25 | 6  | 0 | -1.557942 | -2.515670 | 0.402579  |
| 26 | 1  | 0 | -2.208973 | -4.166340 | -0.832623 |
| 27 | 1  | 0 | -2.505033 | -4.394207 | 0.911340  |
| 28 | 1  | 0 | -0.853341 | -1.952815 | -1.456768 |
| 29 | 1  | 0 | -2.477266 | -1.944171 | 0.245040  |
| 30 | 1  | 0 | -1.210090 | -2.359381 | 1.431057  |
| 31 | 53 | 0 | -1.758153 | 0.892063  | -0.851187 |

SCF Done: E(RM062X) = -939.380423661 A.U. after 1 cycles

Frequencies -- -212.3271 cm<sup>-1</sup>
